# Supplementary material for: Association of High-Dose Erythropoietin With Circulating Biomarkers and Neurodevelopmental Outcomes Among Neonates With Hypoxic Ischemic Encephalopathy: A Secondary Analysis of the HEAL Randomized Clinical Trial
Source: PubMed Central journal article supplement (PMC10329214; doi:10.1001/jamanetworkopen.2023.22131), 2023-07-07
Supplement: jamanetwopen-e2322131-s002.pdf [file jamanetwopen-e2322131-s002.pdf]

## Supplemental Online Content

Juul SE, Voldal E, Comstock BA, et al; HEAL consortium. Association of high-dose erythropoietin with circulating biomarkers and neurodevelopmental outcomes among neonates with hypoxic ischemic encephalopathy: a secondary analysis of the HEAL randomized clinical trial. *JAMA Netw Open*. 2023;6(7):e2322131. doi:10.1001/jamanetworkopen.2023.22131

**eTable 1.** Univariate Relative Risks (RRs) for the Association Between Each Biomarker Measure and the Primary Outcome of Death or Neurodevelopmental Impairment

**eFigure 1.** Selection of Biomarkers by LASSO Within Each Time Point

**eFigure 2.** ROC Curves

**eTable 2.** Predictive Ability of Biomarker Data Sets

**eTable 3.** AUC From Multivariable Models of Biomarker Concentrations and Their Association With Death or NDI

**eTable 4.** Adjusted *P* Values for Comparisons of AUC Between Multivariable Models of Biomarker Concentrations and Their Association With Death or NDI

**eTable 5.** Median Biomarker Values by Treatment Group and Rank-Sum Differences Between Groups

This supplemental material has been provided by the authors to give readers additional information about their work.

**eTable 1.** Univariate Relative Risks (RRs) for the Association Between Each Biomarker Measure and the Primary Outcome of Death or Neurodevelopmental Impairment

Biomarker measures were log<sub>2</sub>-transformed and winsorized. P-values marked with an asterisk remain <.05 after adjusting for multiple comparisons.

| Biomarker                | Timepoint       | No death/NDI median (IQR) | Death/NDI median (IQR) | RR (95% CI)              | Unadjusted p-value |
|--------------------------|-----------------|---------------------------|------------------------|--------------------------|--------------------|
| <b>Anti-Inflammatory</b> |                 |                           |                        |                          |                    |
| IL-1RA                   | Baseline        | 5240.4 (12222.9)          | 8517.7 (19461.3)       | 1.07 (0.99, 1.16)        | 0.08               |
|                          | Day 2           | 2420.4 (4008.2)           | 2273.4 (2933.7)        | 1.05 (0.95, 1.16)        | 0.31               |
|                          | Day 4           | 2396.9 (3051.7)           | 2690.2 (4322.5)        | 1.1 (1, 1.22)            | 0.05               |
| <b>IL-10</b>             | <b>Baseline</b> | <b>43.3 (73.9)</b>        | <b>94.2 (510.8)</b>    | <b>1.13 (1.06, 1.21)</b> | <b>&lt;0.001*</b>  |
|                          | Day 2           | 25.0 (26.2)               | 31.9 (81.3)            | 1.15 (1.05, 1.26)        | 0.002              |
|                          | <b>Day 4</b>    | <b>12.3 (10.1)</b>        | <b>15.54(16.4)</b>     | <b>1.27 (1.11, 1.44)</b> | <b>&lt;0.001*</b>  |
| IL-13                    | Baseline        | 0.8 (4.2)                 | 2.0 (8.5)              | 1.06 (1, 1.11)           | 0.04               |
|                          | Day 2           | 0.8 (3.5)                 | 2.2 (9.2)              | 1.07 (1.02, 1.13)        | 0.005              |
|                          | Day 4           | 0.6 (3.0)                 | 1.5 (8.8)              | 1.08 (1.03, 1.14)        | 0.002              |
| IL-33                    | Baseline        | 5.1 (3.8)                 | 5.9 (4.1)              | 1.17 (1.01, 1.36)        | 0.03               |
|                          | Day 2           | 4.7 (2.4)                 | 5.1 (3.6)              | 1.15 (0.96, 1.38)        | 0.13               |
|                          | Day 4           | 5.2 (2.8)                 | 5.4 (3.3)              | 1.07 (0.9, 1.28)         | 0.43               |
| <b>Pro-inflammatory</b>  |                 |                           |                        |                          |                    |
| <b>IL-8</b>              | <b>Baseline</b> | <b>102.7 (140.4)</b>      | <b>199.3 (442.5)</b>   | <b>1.16 (1.07, 1.26)</b> | <b>&lt;0.001*</b>  |
|                          | Day 2           | 89.1 (157.2)              | 108.44 (242.1)         | 1.18 (1.06, 1.31)        | 0.003              |
|                          | <b>Day 4</b>    | <b>65.8 (68.1)</b>        | <b>93.64 (124.5)</b>   | <b>1.24 (1.12, 1.37)</b> | <b>&lt;0.001*</b>  |
| C5a                      | Baseline        | 24074.9 (15597.2)         | 24703.8 (18545.6)      | 0.84 (0.72, 0.99)        | 0.03               |
|                          | Day 2           | 24720.9 (15214.5)         | 22860.6 (15735.6)      | 0.82 (0.7, 0.97)         | 0.02               |
|                          | Day 4           | 18700.1 (8102.2)          | 18615.5 (13468.7)      | 0.89 (0.73, 1.09)        | 0.26               |
| <b>Fractalkine</b>       | Baseline        | 96.7 (73.3)               | 132.7 (154.7)          | 1.28 (1.11, 1.48)        | 0.001              |
|                          | Day 2           | 89.8 (63)                 | 107 (131.8)            | 1.27 (1.07, 1.51)        | 0.006              |
|                          | <b>Day 4</b>    | <b>111.6 (66.3)</b>       | <b>132.5 (86.7)</b>    | <b>1.51 (1.22, 1.88)</b> | <b>&lt;0.001*</b>  |
| ICAM-1                   | Baseline        | 472688 (263565)           | 567677 (369987)        | 1.16 (0.94, 1.41)        | 0.16               |

|                       |              |                    |                    |                         |                   |
|-----------------------|--------------|--------------------|--------------------|-------------------------|-------------------|
|                       | Day 2        | 559796 (248581)    | 601280 (314263)    | 1.14 (0.9, 1.45)        | 0.27              |
|                       | Day 4        | 624453 (212340)    | 655784 (224818)    | 1.12 (0.86, 1.46)       | 0.41              |
| IFN-g                 | Baseline     | 4.03 (5.06)        | 5.34 (8.79)        | 1.1 (1, 1.22)           | 0.04              |
|                       | Day 2        | 3.91 (4.11)        | 4.51 (11.5)        | 1.09 (0.99, 1.2)        | 0.08              |
|                       | Day 4        | 4.05 (5.09)        | 4.95 (11.33)       | 1.16 (1.05, 1.28)       | 0.004             |
| <b>IL-1b</b>          | Baseline     | 0.47 (0.55)        | 0.7 (1.71)         | 1.11 (1.01, 1.22)       | 0.03              |
|                       | Day 2        | 0.49 (0.43)        | 0.57 (1.27)        | 1.17 (1.05, 1.29)       | 0.004             |
|                       | <b>Day 4</b> | <b>0.49 (0.51)</b> | <b>0.66 (1.16)</b> | <b>1.22 (1.1, 1.36)</b> | <b>&lt;0.001*</b> |
| IL-6                  | Baseline     | 30.8 (73.7)        | 62.2 (220.7)       | 1.11 (1.04, 1.18)       | 0.001             |
|                       | Day 2        | 42.3 (52.1)        | 40.5 (80.0)        | 1.1 (1.01, 1.2)         | 0.03              |
|                       | Day 4        | 12.65 (21.4)       | 13.22 (23.8)       | 1.07 (0.98, 1.16)       | 0.13              |
| <b>IL-12p70</b>       | Baseline     | 0.5 (0.4)          | 0.76 (0.8)         | 1.15 (1.05, 1.27)       | 0.003             |
|                       | Day 2        | 0.57 (0.5)         | 0.77 (1.8)         | 1.1 (1, 1.21)           | 0.05              |
|                       | <b>Day 4</b> | <b>0.59 (0.6)</b>  | <b>0.89 (0.93)</b> | <b>1.25 (1.1, 1.41)</b> | <b>&lt;0.001*</b> |
| <b>IL-17A</b>         | Baseline     | 1.13 (1.05)        | 1.48 (2.07)        | 1.17 (1.05, 1.3)        | 0.006             |
|                       | Day 2        | 1.21 (1.03)        | 1.68 (2.55)        | 1.18 (1.06, 1.31)       | 0.002             |
|                       | <b>Day 4</b> | <b>1.39 (1.05)</b> | <b>2.03 (3.13)</b> | <b>1.25 (1.12, 1.4)</b> | <b>&lt;0.001*</b> |
| MCP-1                 | Baseline     | 267.5 (327.6)      | 364.1 (479.5)      | 1.13 (1.03, 1.23)       | 0.009             |
|                       | Day 2        | 754.5 (640.5)      | 626.6 (776.7)      | 1.06 (0.94, 1.19)       | 0.33              |
|                       | Day 4        | 572.2 (428)        | 677.8 (552.9)      | 1.21 (1.05, 1.39)       | 0.007             |
| MIP-1a                | Baseline     | 17.9 (19.8)        | 19.4 (21.4)        | 1.04 (0.97, 1.11)       | 0.30              |
|                       | Day 2        | 26.8 (18.8)        | 27.4 (22.8)        | 1.12 (1.01, 1.25)       | 0.03              |
|                       | Day 4        | 20.9 (18.6)        | 23.8 (22.8)        | 1.03 (0.96, 1.11)       | 0.41              |
| MIP-1b                | Baseline     | 53 (35)            | 61.7 (47.4)        | 1.02 (0.85, 1.22)       | 0.83              |
|                       | Day 2        | 75.5 (41.5)        | 61.8 (43)          | 0.85 (0.71, 1.03)       | 0.10              |
|                       | Day 4        | 61.7 (36)          | 54.74(39.9)        | 0.84 (0.69, 1.01)       | 0.06              |
| VCAM-1                | Baseline     | 4760323 (1459255)  | 4388853(1868927)   | 0.85 (0.63, 1.15)       | 0.30              |
|                       | Day 2        | 2328579 (1459946)  | 2651081(1938964)   | 1.23 (1, 1.51)          | 0.05              |
|                       | Day 4        | 3510876 (2393847)  | 4047734(1931618)   | 1.19 (0.91, 1.57)       | 0.21              |
| TNF-a                 | Baseline     | 24.9 (15.5)        | 27 (17.3)          | 1.06 (0.89, 1.27)       | 0.50              |
|                       | Day 2        | 34.3 (16.6)        | 28.7 (19.7)        | 0.97 (0.79, 1.19)       | 0.78              |
|                       | Day 4        | 31.9 (17.4)        | 27.1 (15.5)        | 0.83 (0.65, 1.06)       | 0.13              |
| <b>Brain specific</b> |              |                    |                    |                         |                   |

|                             |                 |                        |                        |                          |                   |
|-----------------------------|-----------------|------------------------|------------------------|--------------------------|-------------------|
| GFAP                        | Baseline        | 828.2 (712.3)          | 1066.3 (1026.9)        | 1.08 (0.96, 1.23)        | 0.21              |
|                             | Day 2           | 637.2 (448.3)          | 1145 (2033)            | 1.21 (1.08, 1.36)        | 0.001             |
|                             | Day 4           | 1141.6 (886)           | 1743 (3023)            | 1.14 (1.04, 1.24)        | 0.005             |
| NSE*                        | Baseline        | 44232 (25619)          | 48512 (35595)          | 1.17 (0.92, 1.49)        | 0.19              |
|                             | Day 2           | 42488 (24194)          | 51830.5 (26324.8)      | 1.34 (1.07, 1.67)        | 0.01              |
|                             | Day 4           | 29719 (18785)          | 39192.4 (27063.2)      | 1.25 (1.01, 1.53)        | 0.04              |
| <b>S100b</b>                | <b>Baseline</b> | <b>1285.5 (1974.6)</b> | <b>3060.6 (7528.4)</b> | <b>1.12 (1.05, 1.2)</b>  | <b>0.001*</b>     |
|                             | Day 2           | 813.1 (1268.4)         | 1670.3 (2602.8)        | 1.18 (1.07, 1.3)         | 0.001             |
|                             | Day 4           | 978.4 (837.6)          | 1284.1 (1416.7)        | 1.19 (1.06, 1.33)        | 0.003             |
| <b>UCHL1</b>                | <b>Baseline</b> | <b>1956.1 (1353.5)</b> | <b>2500.6 (3246.9)</b> | <b>1.15 (1.06, 1.25)</b> | <b>0.001*</b>     |
|                             | Day 2           | 1673.8 (735.2)         | 2018.1 (1158.8)        | 1.11 (0.99, 1.24)        | 0.07              |
|                             | Day 4           | 1486.4 (832)           | 1993.8 (1014.6)        | 1.31 (1.05, 1.64)        | 0.02              |
| <b>Tau</b>                  | Baseline        | 173.5 (129.5)          | 224.8 (328.4)          | 1.08 (0.95, 1.22)        | 0.26              |
|                             | <b>Day 2</b>    | <b>121.7 (99.0)</b>    | <b>275.6 (563.1)</b>   | <b>1.32 (1.17, 1.49)</b> | <b>&lt;0.001*</b> |
|                             | <b>Day 4</b>    | <b>126.2 (107.7)</b>   | <b>375.6 (1352.3)</b>  | <b>1.28 (1.17, 1.4)</b>  | <b>&lt;0.001*</b> |
| <b>Other Growth Factors</b> |                 |                        |                        |                          |                   |
| <b>BDNF</b>                 | Baseline        | 247.6 (380.4)          | 248.2 (388.1)          | 1 (0.92, 1.09)           | 0.98              |
|                             | Day 2           | 147.7 (234.8)          | 142.6 (242.1)          | 1.03 (0.94, 1.14)        | 0.54              |
|                             | Day 4           | 305.8 (597.9)          | 311.5 (541.1)          | 1.01 (0.93, 1.1)         | 0.80              |
| <b>Epo</b>                  | Baseline        | 26.6 (39.6)            | 44 (272.9)             | 1.05 (1, 1.1)            | 0.03              |
| <b>NCAM-1</b>               | Baseline        | 307426.9 (53158.2)     | 311411 (87537)         | 0.69 (0.44, 1.09)        | 0.11              |
|                             | Day 2           | 302430.7 (69229.1)     | 300049.4 (84018)       | 0.71 (0.42, 1.19)        | 0.19              |
|                             | Day 4           | 291749.6 (61037)       | 281575.2 (74692)       | 0.54 (0.34, 0.87)        | 0.01              |
| <b>NGB</b>                  | Baseline        | 10.0 (8.7)             | 12.2 (9.8)             | 1.17 (1.04, 1.33)        | 0.01              |
|                             | Day 2           | 9.7 (6.5)              | 10.4 (8.1)             | 1.24 (1.04, 1.47)        | 0.01              |
|                             | Day 4           | 9.7 (5.8)              | 10.7 (6.5)             | 1.26 (1.05, 1.52)        | 0.02              |
| <b>VEGF</b>                 | Baseline        | 32.8 (19.3)            | 25.6 (20)              | 0.88 (0.76, 1.02)        | 0.09              |
|                             | Day 2           | 40.5 (14.8)            | 34.6 (26.8)            | 0.88 (0.76, 1.01)        | 0.08              |
|                             | Day 4           | 44.2 (20.4)            | 45.6 (25.9)            | 1.05 (0.85, 1.3)         | 0.65              |

Abbreviations: BDNF: brain-derived neurotrophic factor; C5a: complement component 5a; CI: confidence interval; EPO: erythropoietin; GFAP: glial fibrillary acidic protein; ICAM-1: intercellular adhesion molecule 1; IFN-g: Interferon-g; IL: Interleukin; IL-1RA: IL-1 receptor antagonist; MCP-1: monocyte chemoattractant protein-1; IQR: Interquartile range; MIP: macrophage inflammatory protein; NCAM-1: neural cell adhesion molecule; NGB: neuroregulin-1-b-1; NSE: neuron-specific enolase; RR: Relative risk; s100b: S100 calcium-binding protein B; TNF-a: tumor necrosis factor-a; UCHL1: ubiquitin carboxy-terminal hydrolase-L1; VCAM-1: vascular cell adhesion molecule 1; VEGF: vascular endothelial growth factor.

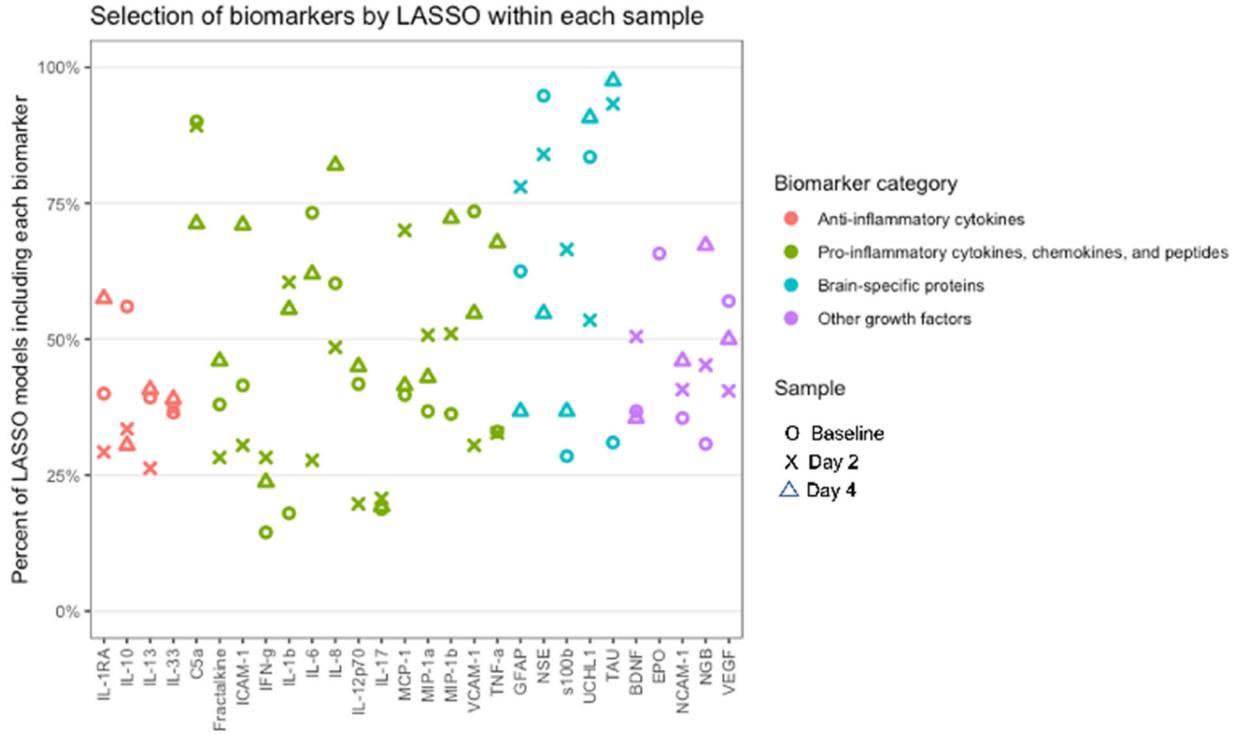

**Figure 1. Selection of Biomarkers by LASSO Within Each Time Point**

Biomarkers within the pro-inflammatory cytokines/chemokines/peptides and brain-specific protein categories were most often selected by LASSO. Note: p-values are not indicative of effect size.

## eFigure 2. ROC Curves

ROC curves are compared for baseline clinical data (BCD), BCD with biomarker concentrations at baseline, day 2, and day 4 timepoints, and finally, BCD with a curated set of biomarkers. The addition of biomarker data from baseline, day 4, or a curated set to BCD improved area under the curve (AUC) scores compared to BCD alone.

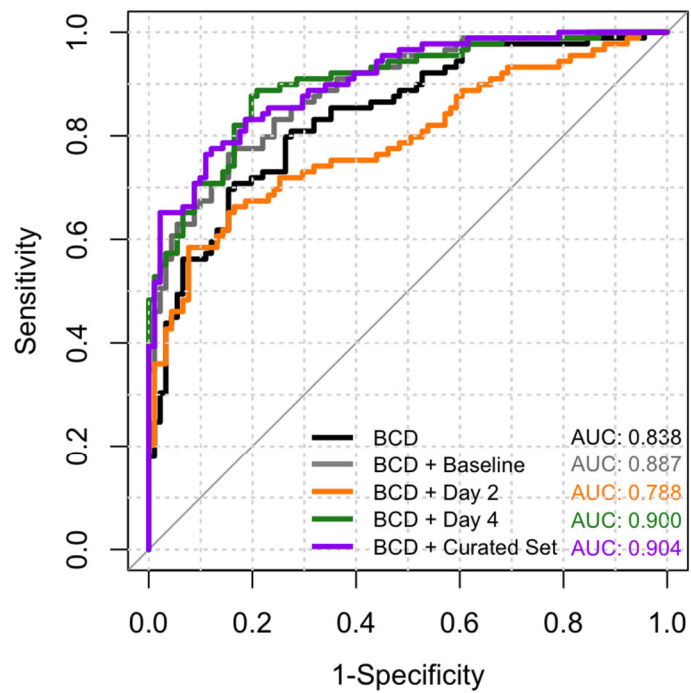

**eTable 2.** Predictive Ability of Biomarker Data Sets

| Biomarker                                     | RR (95% CI) from model with clinical biomarkers | RR (95% CI) from model with experimental biomarkers | RR (95% CI) from full model |
|-----------------------------------------------|-------------------------------------------------|-----------------------------------------------------|-----------------------------|
| Female Sex                                    | 0.93 (0.70, 1.23)                               |                                                     | 1.00 (0.75, 1.35)           |
| 5-minute Apgar                                | 0.96 (0.89, 1.03)                               |                                                     | 0.99 (0.92, 1.07)           |
| Continue resuscitation at 10 min <sup>a</sup> | 1.47 (0.68, 3.19)                               |                                                     | 1.36 (0.64, 2.9)            |
| Worst base deficit <sup>b</sup>               | 0.99 (0.96, 1.02)                               |                                                     | 1.01 (0.98, 1.04)           |
| Lowest pH <sup>b</sup>                        | 0.62 (0.21,1.89)                                |                                                     | 0.67 (0.26, 1.78)           |
| HIE Severity                                  | 1.00 (0.75-1.32)                                | 1.34 (1-1.81)                                       | 1.28 (0.93-1.78)            |
| C5a (baseline)                                |                                                 | 0.82 (0.71, 0.94)                                   | 0.82 (0.71, 0.94)           |
| IL-6 (baseline)                               |                                                 | 1.08 (1.01, 1.16)                                   | 1.08 (1.0, 1.16)            |
| NSE (baseline)                                |                                                 | 1.19 (1.02, 1.4)                                    | 1.21 (1.01, 1.45)           |
| IL-8 (day 4)                                  |                                                 | 1.09 (0.96, 1.23)                                   | 1.09 (0.96, 1.24)           |
| Tau (day 4)                                   |                                                 | 1.16 (1.06, 1.28)                                   | 1.16 (1.04, 1.28)           |
| UCHL1 (day 4)                                 |                                                 | 1.14 (0.97, 1.35)                                   | 1.15 (0.96, 1.37)           |

<sup>a</sup> Ongoing resuscitation with chest compressions, mechanical ventilation, or both was warranted at 10 minutes of age.

<sup>b</sup> Shown is the lowest pH or worst base deficit among cord arterial, cord venous, or arterial blood gas samples obtained before 60 minutes of age.

Abbreviations: C5a: complement component 5a; CI: confidence interval; IL: Interleukin; NSE: neuron-specific enolase; RR: relative risk; UCHL1: ubiquitin carboxy-terminal hydrolase-L1.

**eTable 3.** AUC From Multivariable Models of Biomarker Concentrations and Their Association With Death or NDI

Adjusted for HIE severity, treatment assignment, and site, pooled over multiply imputed data.

| <b>Model</b>                 | <b>Data</b>                                                                             | <b>AUC (95% CI)</b> |
|------------------------------|-----------------------------------------------------------------------------------------|---------------------|
| Baseline clinical data       | HIE severity, treatment assignment, site, baseline clinical variables <sup>a</sup>      | 0.73 (0.70-0.75)    |
| Top 5 biomarkers at baseline | Baseline clinical data + baseline biomarkers <sup>b</sup>                               | 0.77 (0.75-0.80)    |
| Top 5 biomarkers at day 2    | Baseline clinical data + day 2 biomarkers <sup>b</sup>                                  | 0.76 (0.73-0.78)    |
| Top 5 biomarkers at day 4    | Baseline clinical data + day 4 biomarkers <sup>b</sup>                                  | 0.79 (0.77-0.81)    |
| Curated set of biomarkers    | Baseline clinical data + curated set of biomarkers from baseline and day 4 <sup>c</sup> | 0.78 (0.75-0.80)    |

<sup>a</sup>Baseline clinical data includes infant sex, 5-minute Apgar score, continued resuscitation at 10 minutes, lowest pH, and worst base deficit.

<sup>b</sup> Five most-selected biomarkers at each timepoint after bootstrapped LASSO.

<sup>c</sup> Curated set of biomarkers includes concentrations of C5a, IL-6, and NSE at baseline as well as IL-8 and Tau at day 4.



**eTable 4.** Adjusted *P* Values for Comparisons of AUC Between Multivariable Models of Biomarker Concentrations and Their Association With Death or NDI

Adjusted for HIE severity, treatment assignment, and site, pooled over multiply imputed data.

|                                                           | Baseline clinical data <sup>a</sup> | Baseline clinical data <sup>a</sup> + Baseline biomarkers <sup>b</sup> | Baseline clinical data <sup>a</sup> + Day 2 biomarkers <sup>b</sup> | Baseline clinical data <sup>a</sup> + Day 4 biomarkers <sup>b</sup> | Baseline clinical data <sup>a</sup> + Curated set <sup>c</sup> |
|-----------------------------------------------------------|-------------------------------------|------------------------------------------------------------------------|---------------------------------------------------------------------|---------------------------------------------------------------------|----------------------------------------------------------------|
| Baseline clinical data <sup>a</sup>                       | .                                   | <b>0.04</b>                                                            | 0.63                                                                | <b>0.003</b>                                                        | <b>0.03</b>                                                    |
| Baseline clinical data + Baseline biomarkers <sup>b</sup> | .                                   | .                                                                      | 1.0                                                                 | 1.0                                                                 | 0.89                                                           |
| Baseline clinical data + Day 2 biomarkers <sup>b</sup>    | .                                   | .                                                                      | .                                                                   | 1.0                                                                 | 0.30                                                           |
| Baseline clinical data + Day 4 biomarkers <sup>b</sup>    | .                                   | .                                                                      | .                                                                   | .                                                                   | 0.83                                                           |

<sup>a</sup>Baseline clinical data includes infant sex, 5-minute Apgar score, continued resuscitation at 10 minutes, lowest pH, and worst base deficit.

<sup>b</sup>Five most-selected biomarkers at each timepoint after bootstrapped LASSO.

<sup>c</sup>Curated set of biomarkers includes concentrations of C5a, IL-6, and NSE at baseline as well as IL-8 and Tau at day 4.

**eTable 5.** Median Biomarker Values by Treatment Group and Rank-Sum Differences Between Groups

| Biomarker                | Timepoint | Epo                 | Placebo             | Difference (95% CI)         | P value |
|--------------------------|-----------|---------------------|---------------------|-----------------------------|---------|
| <b>Anti-inflammatory</b> |           |                     |                     |                             |         |
| IL-1RA                   | Baseline  | 6292.1 (14906.5)    | 6010.3 (14825.5)    | 371.8 (-1276.0, 2115.1)     | 0.59    |
|                          | Day 2     | 2273.4 (3331.7)     | 2374.0 (2871.2)     | 156.7 (-366.7, 691.6)       | 0.59    |
|                          | Day 4     | 2431.0 (3334.3)     | 2603.6 (3621.6)     | 54.0 (-461.7, 635.9)        | 0.85    |
| IL-10                    | Baseline  | 75.9 (202.6)        | 50.7 (97.7)         | -9.3 (-30.0, 5.3)           | 0.22    |
|                          | Day 2     | 26.4 (45.2)         | 31.4 (39.3)         | 3.6 (-2.0, 9.3)             | 0.20    |
|                          | Day 4     | 14.9 (12.8)         | 12.3 (11.6)         | -1.9 (-4.4, 0.5)            | 0.13    |
| IL-13                    | Baseline  | 1.8 (7.0)           | 0.8 (4.3)           | -0.0 (-0.6, 0.0)            | 0.42    |
|                          | Day 2     | 1.0 (5.5)           | 1.1 (6.6)           | 0.0 (-0.2, 0.2)             | 0.91    |
|                          | Day 4     | 1.4 (4.9)           | 0.8 (5.9)           | 0.0 (-0.1, 0.1)             | 0.96    |
| IL-33                    | Baseline  | 5.2 (3.7)           | 6.0 (3.5)           | 0.5 (-0.3, 1.3)             | 0.24    |
|                          | Day 2     | 4.5 (2.9)           | 5.2 (3.2)           | 0.2 (-0.5, 0.9)             | 0.56    |
|                          | Day 4     | 5.2 (2.9)           | 5.6 (3.0)           | 0.1 (-0.6, 0.9)             | 0.70    |
| <b>Pro-inflammatory</b>  |           |                     |                     |                             |         |
| IL-8                     | Baseline  | 119.3 (219.9)       | 162.6 (311.7)       | 8.1 (-25.9, 52.8)           | 0.68    |
|                          | Day 2     | 86.6 (172.3)        | 106.2 (203.1)       | 10.7 (-11.2, 35.1)          | 0.32    |
|                          | Day 4     | 74.4 (84.1)         | 76.6 (93.9)         | -0.2 (-16.0, 15.0)          | 0.97    |
| C5a                      | Baseline  | 24650.5 (15979.3)   | 25089.3 (20858.4)   | 1580.2 (-2310.1, 5414.3)    | 0.42    |
|                          | Day 2     | 22995.5 (14242.9)   | 24997.2 (17682.5)   | 1976.8 (-1336.9, 5360.4)    | 0.22    |
|                          | Day 4     | 19188.7 (12700.5)   | 18672.7 (10909.0)   | -893.5 (-3563.3, 1592.1)    | 0.49    |
| Fractalkine              | Baseline  | 110.0 (98.3)        | 115.3 (99.5)        | 3.1 (-15.3, 22.7)           | 0.75    |
|                          | Day 2     | 98.9 (80.7)         | 91.5 (92.2)         | 3.3 (-11.2, 17.8)           | 0.65    |
|                          | Day 4     | 127.0 (75.5)        | 101.5 (67.2)        | -15.5 (-31.9, -1.2)         | 0.03    |
| ICAM-1                   | Baseline  | 478728.8 (352762.3) | 538608.8 (312167.1) | 12642.7 (-51633.0, 80657.7) | 0.74    |
|                          | Day 2     | 554166.0 (336392.4) | 598993.6 (274063.2) | 13116.1 (-52038.9, 77580.7) | 0.67    |
|                          | Day 4     | 622106.7 (247463.3) | 639304.2 (208309.0) | -1413.2 (-59723.8, 55838.6) | 0.96    |
| IFN-g                    | Baseline  | 4.5 (6.8)           | 4.5 (6.6)           | 0.1 (-0.9, 1.1)             | 0.91    |
|                          | Day 2     | 4.1 (5.0)           | 4.1 (7.1)           | 0.1 (-0.8, 1.0)             | 0.85    |
|                          | Day 4     | 5.0 (7.7)           | 4.0 (7.3)           | -0.1 (-1.2, 0.9)            | 0.80    |
| IL-1b                    | Baseline  | 0.6 (1.0)           | 0.5 (0.8)           | -0.0 (-0.2, 0.1)            | 0.90    |
|                          | Day 2     | 0.5 (0.6)           | 0.5 (0.8)           | 0.0 (-0.1, 0.1)             | 0.84    |
|                          | Day 4     | 0.6 (0.8)           | 0.5 (0.7)           | -0.1 (-0.3, 0.0)            | 0.10    |
| IL-6                     | Baseline  | 44.4 (75.2)         | 45.3 (123.8)        | -3.0 (-15.3, 11.0)          | 0.66    |
|                          | Day 2     | 41.1 (54.8)         | 40.9 (76.9)         | -2.0 (-12.1, 8.2)           | 0.72    |
|                          | Day 4     | 13.4 (19.8)         | 12.0 (26.0)         | -1.3 (-4.8, 2.0)            | 0.41    |

|                             |          |                          |                          |                                    |      |
|-----------------------------|----------|--------------------------|--------------------------|------------------------------------|------|
| IL-12p70                    | Baseline | 0.6 (0.7)                | 0.6 (0.6)                | 0.0 (-0.1, 0.2)                    | 0.51 |
|                             | Day 2    | 0.6 (0.9)                | 0.7 (0.8)                | 0.0 (-0.1, 0.2)                    | 0.89 |
|                             | Day 4    | 0.8 (0.8)                | 0.7 (0.7)                | -0.1 (-0.2, 0.0)                   | 0.15 |
| IL-17A                      | Baseline | 1.4 (1.7)                | 1.3 (1.6)                | -0.0 (-0.3, 0.2)                   | 0.78 |
|                             | Day 2    | 1.4 (1.7)                | 1.3 (1.6)                | -0.0 (-0.3, 0.2)                   | 0.70 |
|                             | Day 4    | 1.7 (2.8)                | 1.4 (1.6)                | -0.3 (-0.6, -0.1)                  | 0.02 |
| MCP-1                       | Baseline | 270.6 (342.2)            | 364.1 (486.3)            | 40.2 (-24.3, 120.1)                | 0.23 |
|                             | Day 2    | 715.0 (645.2)            | 683.0 (784.6)            | 10.3 (-131.2, 155.5)               | 0.87 |
|                             | Day 4    | 613.8 (453.9)            | 591.8 (552.9)            | -26.2 (-132.1, 83.5)               | 0.61 |
| MIP-1a                      | Baseline | 22.2 (21.6)              | 17.8 (17.1)              | -0.9 (-6.2, 3.7)                   | 0.63 |
|                             | Day 2    | 26.8 (23.6)              | 27.0 (18.2)              | 1.0 (-4.3, 6.2)                    | 0.71 |
|                             | Day 4    | 22.6 (20.5)              | 21.8 (18.3)              | -1.1 (-6.1, 3.7)                   | 0.61 |
| MIP-1b                      | Baseline | 52.2 (38.7)              | 60.8 (39.4)              | 7.3 (-1.0, 15.7)                   | 0.09 |
|                             | Day 2    | 65.5 (43.3)              | 70.5 (46.6)              | 2.4 (-7.7, 12.6)                   | 0.62 |
|                             | Day 4    | 61.6 (38.0)              | 56.6 (36.9)              | -4.9 (-13.7, 3.8)                  | 0.24 |
| VCAM-1                      | Baseline | 4614152.8<br>(1597457.9) | 4483612.9<br>(1827712.9) | -163637.7 (-556143.5,<br>215673.3) | 0.37 |
|                             | Day 2    | 2503972.0<br>(1777412.6) | 2402529.7<br>(1557905.0) | -18506.0 (-373570.1,<br>338334.9)  | 0.90 |
|                             | Day 4    | 4029849.9<br>(2420664.7) | 3760650.1<br>(2092870.3) | -136420.5 (-575535.0,<br>327152.4) | 0.59 |
| TNF-a                       | Baseline | 27.1 (14.9)              | 24.2 (18.0)              | -2.0 (-5.5, 1.8)                   | 0.32 |
|                             | Day 2    | 31.1 (19.3)              | 32.3 (17.8)              | -0.0 (-4.4, 3.9)                   | 1.00 |
|                             | Day 4    | 32.6 (16.2)              | 29.0 (14.1)              | -2.1 (-5.8, 1.4)                   | 0.23 |
| <b>Brain specific</b>       |          |                          |                          |                                    |      |
| GFAP                        | Baseline | 930.2 (1049.5)           | 920.3 (719.5)            | -47.2 (-214.1, 122.5)              | 0.58 |
|                             | Day 2    | 734.2 (821.4)            | 808.9 (1069.6)           | 85.3 (-64.2, 237.4)                | 0.24 |
|                             | Day 4    | 1193.9 (1224.1)          | 1368.5 (1501.0)          | 130.5 (-148.4, 411.1)              | 0.35 |
| NSE                         | Baseline | 44699.3 (25181.4)        | 46894.5 (29760.3)        | 1672.9 (-3836.7,<br>7729.9)        | 0.54 |
|                             | Day 2    | 47207.7 (24833.6)        | 47452.8 (29819.7)        | 1809.7 (-4453.3,<br>7943.0)        | 0.57 |
|                             | Day 4    | 33944.1 (22685.2)        | 34049.6 (18993.5)        | -295.0 (-5257.3,<br>4560.2)        | 0.90 |
| S100b                       | Baseline | 1659.0 (4453.6)          | 1540.6 (5437.2)          | 148.5 (-250.1, 553.4)              | 0.44 |
|                             | Day 2    | 943.2 (1978.2)           | 1214.6 (1836.2)          | 125.3 (-95.8, 369.9)               | 0.25 |
|                             | Day 4    | 1055.2 (1286.3)          | 1078.7 (1112.1)          | 48.4 (-161.4, 248.4)               | 0.64 |
| UCHL1                       | Baseline | 2129.9 (1969.1)          | 2194.0 (2673.3)          | 8.4 (-345.4, 422.2)                | 0.95 |
|                             | Day 2    | 1901.0 (988.4)           | 1667.8 (1190.6)          | -139.4 (-395.0, 127.9)             | 0.29 |
|                             | Day 4    | 1703.1 (893.2)           | 1638.2 (1081.4)          | -100.4 (-339.0, 149.3)             | 0.40 |
| Tau                         | Baseline | 177.9 (167.4)            | 204.1 (193.0)            | 15.3 (-25.2, 54.6)                 | 0.46 |
|                             | Day 2    | 147.3 (191.5)            | 204.0 (349.4)            | 24.6 (-11.4, 68.2)                 | 0.18 |
|                             | Day 4    | 142.0 (200.9)            | 249.5 (902.2)            | 66.5 (15.4, 157.7)                 | 0.01 |
| <b>Other Growth Factors</b> |          |                          |                          |                                    |      |
| BDNF                        | Baseline | 224.5 (378.6)            | 303.9 (461.4)            | 65.6 (4.7, 137.9)                  | 0.04 |
|                             | Day 2    | 139.6 (248.7)            | 145.0 (217.5)            | 11.4 (-32.3, 46.0)                 | 0.53 |

|        |          |                    |                    |                            |        |
|--------|----------|--------------------|--------------------|----------------------------|--------|
|        | Day 4    | 429.6 (871.4)      | 275.7 (419.5)      | -57.8 (-177.4, 27.8)       | 0.20   |
| Epo    | Baseline | 32.7 (169.9)       | 36.0 (84.5)        | -2.6 (-9.4, 3.7)           | 0.41   |
|        | Day 2    | 1530.2 (4543.6)    | 34.4 (73.8)        | -1466.4 (-1663.1, -1329.2) | <0.001 |
|        | Day 4    | 2681.7 (2447.5)    | 20.5 (46.6)        | -2620.6 (-2866.1, -2496.3) | <0.001 |
| NCAM-1 | Baseline | 306254.2 (63214.0) | 319136.5 (71095.7) | 5782.5 (-6698.3, 18799.6)  | 0.39   |
|        | Day 2    | 297713.4 (76831.1) | 301854.5 (73192.3) | 3111.8 (-12089.7, 18217.8) | 0.68   |
|        | Day 4    | 288952.3 (63329.2) | 283207.9 (68907.3) | 3130.4 (-11812.1, 17082.7) | 0.71   |
| NGB    | Baseline | 11.6 (10.7)        | 11.6 (8.4)         | 0.1 (-1.8, 2.2)            | 0.84   |
|        | Day 2    | 9.4 (6.3)          | 10.5 (6.8)         | 0.7 (-0.9, 2.2)            | 0.43   |
|        | Day 4    | 10.7 (6.9)         | 10.0 (5.7)         | -1.6 (-3.1, 0.0)           | 0.05   |
| VEGF   | Baseline | 27.3 (19.8)        | 33.4 (23.5)        | 3.5 (-1.2, 8.4)            | 0.14   |
|        | Day 2    | 35.8 (21.0)        | 37.8 (19.0)        | 2.3 (-2.8, 7.4)            | 0.35   |
|        | Day 4    | 47.0 (24.8)        | 41.8 (21.6)        | -2.2 (-7.4, 3.4)           | 0.43   |
