# Supplementary material for: Association of High-Dose Erythropoietin With Circulating Biomarkers and Neurodevelopmental Outcomes Among Neonates With Hypoxic Ischemic Encephalopathy: A Secondary Analysis of the HEAL Randomized Clinical Trial
Source: PubMed Central journal article supplement (PMC10329214; doi:10.1001/jamanetworkopen.2023.22131), 2023-07-07
Supplement: jamanetwopen-e2322131-s003.pdf [file jamanetwopen-e2322131-s003.pdf]

\*First name, last name, and suffix (if applicable) are required and will appear in PubMed.

| <b>*Group Name(s): the HEAL consortium</b> |                   |                              |                  |                                       |                                          |                                                         |                                                                                            |
|--------------------------------------------|-------------------|------------------------------|------------------|---------------------------------------|------------------------------------------|---------------------------------------------------------|--------------------------------------------------------------------------------------------|
| <b>*First Name and Middle Initial(s)</b>   | <b>*Last Name</b> | <b>*Suffix (eg, Jr, III)</b> | Academic Degrees | Institution                           | Location (city, state/province, country) | Role or Contribution, eg, chair, principal investigator | Group (if more than 1 Group listed in the byline) and/or Subgroup (eg, Steering Committee) |
| Kaashif                                    | Ahmad             |                              | MD               | Pediatrix Medical Group of San Ar     | San Antonio, TX                          | site PI                                                 | HEAL Consortium                                                                            |
| Mariana                                    | Baserga           |                              | MD               | University of Utah                    | Salt Lake City, UT                       | site PI                                                 | HEAL Consortium                                                                            |
| Ellen                                      | Bendel-Stenzel    |                              | MD               | Mayo Clinic                           | Rochester, MN                            | site PI                                                 | HEAL Consortium                                                                            |
| Kristen                                    | Benninger         |                              | MD               | Nationwide Children's Hospital        | Columbus, OH                             | site PI                                                 | HEAL Consortium                                                                            |
| Lina                                       | Chalak            |                              | MD               | University of Texas Southwestern      | Dallas, TX                               | site PI                                                 | HEAL Consortium                                                                            |
| Taeun                                      | Chang             |                              | MD               | Children's National Hospital          | Washington, DC                           | site PI                                                 | HEAL Consortium                                                                            |
| John                                       | Flibotte          |                              | MD               | Children's Hospital of Philadelphia   | Philadelphia, PA                         | site PI                                                 | HEAL Consortium                                                                            |
| Fernando                                   | Gonzalez          |                              | MD               | University of California, San Franc   | San Francisco, CA                        | site PI                                                 | HEAL Consortium                                                                            |
| Andrea                                     | Lampland          |                              | MD               | Children's Minnesota                  | Minneapolis/St. Paul, MI                 | site PI                                                 | HEAL Consortium                                                                            |
| Nathalie                                   | Maitre            |                              | MD               | Children's Healthcare of Atlanta a    | Atlanta, GA                              | site PI                                                 | HEAL Consortium                                                                            |
| Amit                                       | Mathur            |                              | MD               | Saint Louis University School of M    | St. Louis, MO                            | site PI                                                 | HEAL Consortium                                                                            |
| Stephanie                                  | Merhar            |                              | MD               | Cincinnati Children's Hospital        | Cincinnati, OH                           | site PI                                                 | HEAL Consortium                                                                            |
| Ulrike                                     | Mietzsch          |                              | MD               | University of Washington              | Seattle, WA                              | site PI                                                 | HEAL Consortium                                                                            |
| Brenda                                     | Poindexter        |                              | MD               | Children's Healthcare of Atlanta a    | Atlanta, GA                              | site PI                                                 | HEAL Consortium                                                                            |
| Rakesh                                     | Rao               |                              | MD               | Washington University in St. Louis    | St. Louis, MO                            | site PI                                                 | HEAL Consortium                                                                            |
| David                                      | Riley             |                              | MD               | Cook Children's Medical Center        | Ft. Worth, TX                            | site PI                                                 | HEAL Consortium                                                                            |
| Christopher                                | Smyser            |                              | MD               | Washington University in St. Louis    | St. Louis, MO                            | site PI                                                 | HEAL Consortium                                                                            |
| Gregory                                    | Sokol             |                              | MD               | Indiana University School of Medi     | Indianapolis, IN                         | site PI                                                 | HEAL Consortium                                                                            |
| Krisa                                      | Van Meurs         |                              | MD               | Stanford University                   | Stanford, CA                             | site PI                                                 | HEAL Consortium                                                                            |
| Joern-Hendrik                              | Weitkamp          |                              | MD               | Vanderbilt University Medical Cen     | Nashville, TN                            | site PI                                                 | HEAL Consortium                                                                            |
| Tai-Wei                                    | Wu                |                              | MD               | Children's Hospital Los Angeles       | Los Angeles, CA                          | site PI                                                 | HEAL Consortium                                                                            |
| Toby                                       | Yanowitz          |                              | MD               | University of Pittsburgh School of Me | Pittsburgh, PA                           | site PI                                                 | HEAL Consortium                                                                            |
